# Supplementary material for: Conductive chitosan/polyaniline hydrogel with cell-imprinted topography as a potential substrate for neural priming of adipose derived stem cells
Source: Royal Society of Chemistry journal article supplement (doi:10.1039/d1ra00413a), 2021-01-01
Supplement: d1ra00413a1.pdf [file d1ra00413a1.pdf]

## Supporting Information

### **Conductive chitosan/polyaniline hydrogel with cell- imprinted topography as a potential substrate for neural priming of adipose derived stem cells**

Behnaz Sadat Eftekhari<sup>1,2</sup>, Mahnaz Eskandari<sup>1\*</sup>, Paul Janmey<sup>2\*</sup>, Ali Samadikuchaksaraei<sup>3</sup>,  
Mazaher Gholipourmalekabadi<sup>3,4,5</sup>

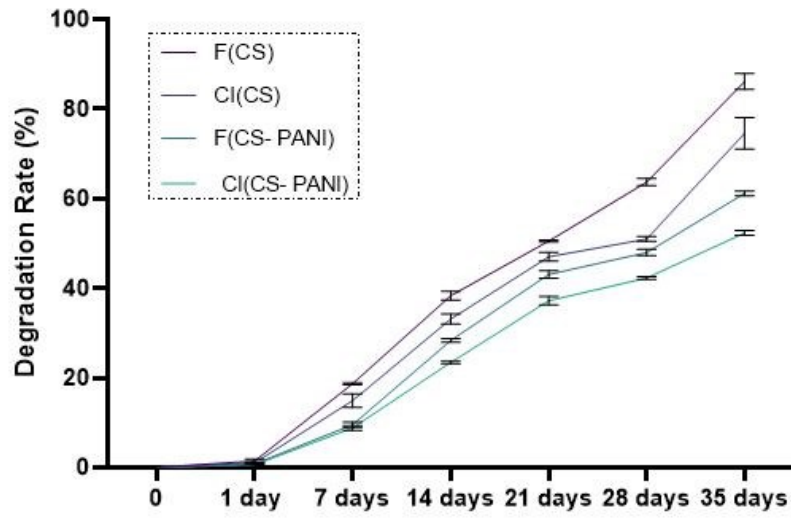

**Supplementary Figure 1.** *In vitro* degradation of prepared substrates in PBS was examined over 35 days under static condition.

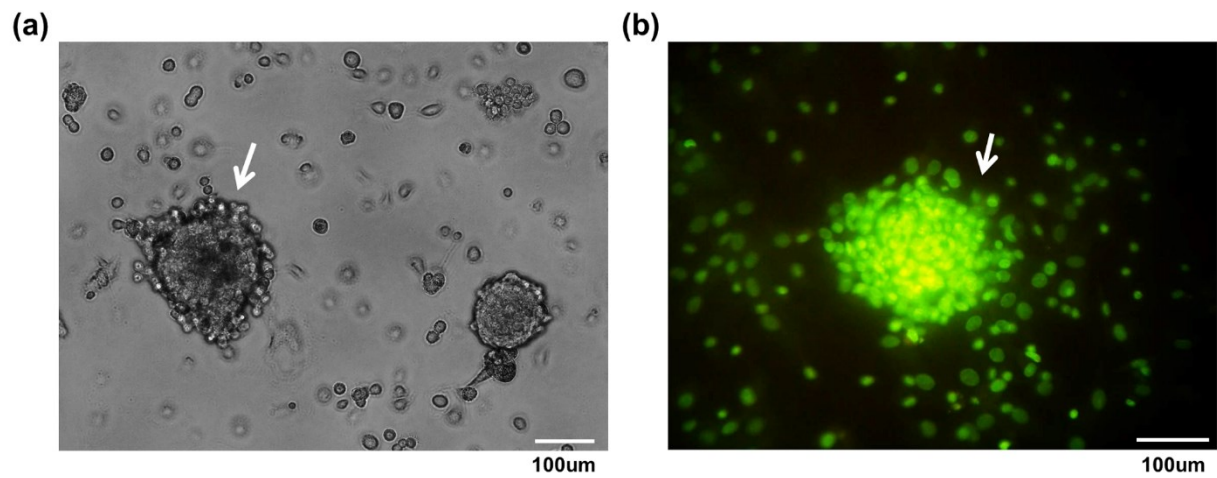

**Supplementary Figure 2.** (a) Neurosphere under light microscope, and (b) neurospheres immuno-stained for Oct4. White arrow indicates neurosphere.
